# Supplementary material for: GM-CSF Production Allows the Identification of Immunoprevalent Antigens Recognized by Human CD4+ T Cells Following Smallpox Vaccination
Source: PubMed Central journal article supplement (PMC3170313; doi:10.1371/journal.pone.0024091), 2011-09-09
Supplement: pone.0024091.s001.pdf [file pone.0024091.s001.pdf]

**VRC19-16  
D13L-YID**

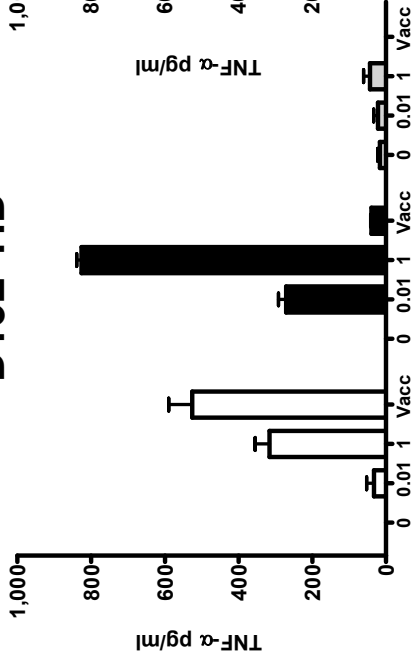

**VRC19-29  
E1L-MYT**

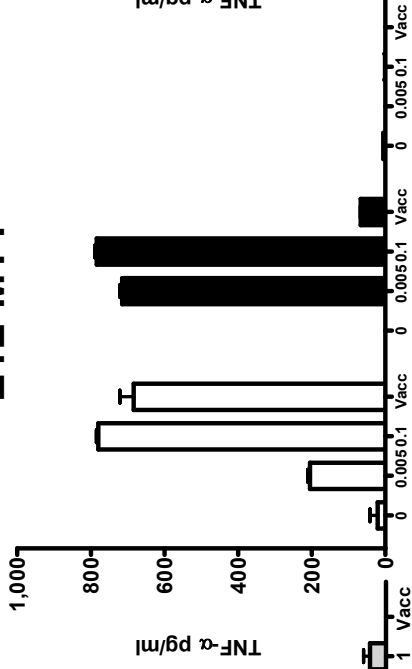

**VRC19-36  
A6L-SFW**

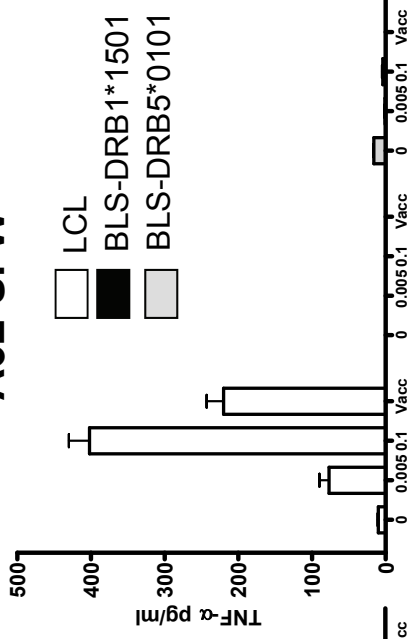

**GM-CSF pg/ml**

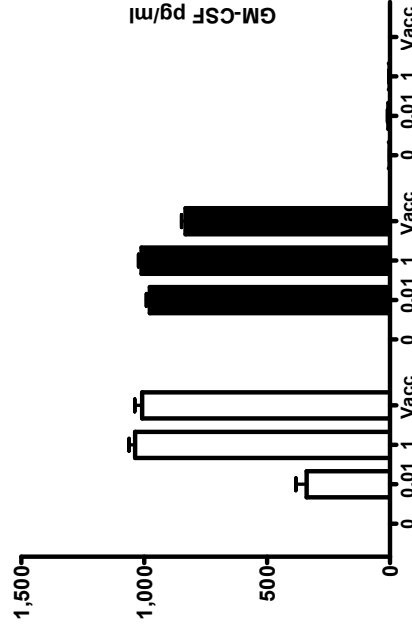

**GM-CSF pg/ml**

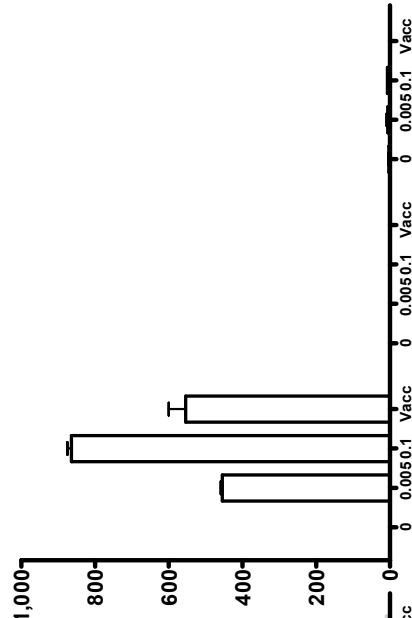

**GM-CSF pg/ml**



Legend:  
 LCL (white)  
 BLS-DRB1\*1501 (black)  
 BLS-DRB5\*0101 (grey)
