# Supplementary material for: GM-CSF Production Allows the Identification of Immunoprevalent Antigens Recognized by Human CD4+ T Cells Following Smallpox Vaccination
Source: PubMed Central journal article supplement (PMC3170313; doi:10.1371/journal.pone.0024091), 2011-09-09
Supplement: pone.0024091.s002.pdf [file pone.0024091.s002.pdf]

**Table 1S.** Matrices derived from screening of decapeptide positional scanning library with clones VRC19-16, VRC19-29, VRC19-36 and VRC47-38

| VRC 19-16 |     | Score D13L <sub>283-292</sub> YIDAYVSRLI = 1526 |     |     |     |     |     |     |     |     |  |
|-----------|-----|-------------------------------------------------|-----|-----|-----|-----|-----|-----|-----|-----|--|
|           | P1  | P2                                              | P3  | P4  | P5  | P6  | P7  | P8  | P9  | P10 |  |
| A         | 14  | 32                                              | 20  | 211 | 23  | 13  | 24  | 0   | 16  | 17  |  |
| C         | 114 | 138                                             | 44  | 0   | 76  | 1   | 2   | 4   | 53  | 55  |  |
| D         | 12  | 25                                              | 91  | 87  | 48  | 34  | 0   | 1   | 35  | 1   |  |
| E         | 37  | 0                                               | 0   | 1   | 18  | 0   | 0   | 0   | 9   | 2   |  |
| F         | 90  | 48                                              | 47  | 27  | 31  | 15  | 0   | 25  | 87  | 78  |  |
| G         | 8   | 9                                               | 3   | 1   | 45  | 1   | 43  | 0   | 18  | 5   |  |
| H         | 33  | 25                                              | 24  | 12  | 100 | 8   | 0   | 5   | 149 | 31  |  |
| I         | 31  | 49                                              | 40  | 0   | 22  | 19  | 10  | 22  | 54  | 39  |  |
| K         | 7   | 20                                              | 4   | 0   | 4   | 0   | 0   | 0   | 7   | 4   |  |
| L         | 46  | 73                                              | 44  | 0   | 97  | 52  | 45  | 52  | 106 | 53  |  |
| M         | 150 | 37                                              | 26  | 30  | 50  | 16  | 0   | 16  | 40  | 38  |  |
| N         | 56  | 10                                              | 32  | 19  | 38  | 22  | 21  | 30  | 24  | 1   |  |
| P         | 6   | 10                                              | 0   | 0   | 13  | 0   | 0   | 0   | 143 | 29  |  |
| Q         | 19  | 26                                              | 83  | 235 | 20  | 0   | 0   | 0   | 20  | 17  |  |
| R         | 74  | 58                                              | 48  | 78  | 94  | 18  | 53  | 382 | 93  | 139 |  |
| S         | 4   | 6                                               | 30  | 129 | 22  | 1   | 121 | 39  | 10  | 2   |  |
| T         | 4   | 1                                               | 6   | 18  | 2   | 0   | 5   | 2   | 25  | 0   |  |
| V         | 29  | 47                                              | 30  | 0   | 170 | 244 | 80  | 0   | 40  | 58  |  |
| W         | 213 | 122                                             | 140 | 165 | 7   | 96  | 40  | 60  | 35  | 31  |  |
| Y         | 60  | 17                                              | 16  | 42  | 209 | 95  | 0   | 0   | 18  | 316 |  |

| VRC 19-29 |    | Score E1L <sub>396-405</sub> MYTYFSNTIL = 699 |     |    |     |    |    |    |     |     |  |
|-----------|----|-----------------------------------------------|-----|----|-----|----|----|----|-----|-----|--|
|           | P1 | P2                                            | P3  | P4 | P5  | P6 | P7 | P8 | P9  | P10 |  |
| A         | 1  | 17                                            | 0   | 0  | 6   | 2  | 0  | 0  | 0   | 23  |  |
| C         | 36 | 22                                            | 1   | 0  | 19  | 11 | 0  | 0  | 50  | 4   |  |
| D         | 8  | 19                                            | 0   | 0  | 42  | 19 | 0  | 0  | 8   | 29  |  |
| E         | 0  | 20                                            | 0   | 4  | 0   | 3  | 0  | 15 | 5   | 3   |  |
| F         | 12 | 18                                            | 4   | 2  | 18  | 6  | 0  | 11 | 27  | 3   |  |
| G         | 10 | 23                                            | 0   | 0  | 10  | 11 | 1  | 0  | 45  | 12  |  |
| H         | 27 | 2                                             | 5   | 0  | 6   | 1  | 0  | 0  | 36  | 15  |  |
| I         | 82 | 12                                            | 5   | 1  | 23  | 0  | 4  | 19 | 210 | 40  |  |
| K         | 1  | 16                                            | 0   | 0  | 1   | 2  | 0  | 0  | 0   | 16  |  |
| L         | 67 | 2                                             | 5   | 0  | 14  | 0  | 3  | 3  | 36  | 21  |  |
| M         | 64 | 8                                             | 3   | 1  | 5   | 1  | 0  | 0  | 33  | 19  |  |
| N         | 21 | 5                                             | 0   | 0  | 12  | 31 | 64 | 10 | 18  | 8   |  |
| P         | 6  | 0                                             | 0   | 0  | 3   | 0  | 0  | 0  | 14  | 1   |  |
| Q         | 5  | 14                                            | 0   | 0  | 9   | 0  | 0  | 0  | 41  | 12  |  |
| R         | 11 | 4                                             | 14  | 0  | 27  | 0  | 9  | 8  | 28  | 10  |  |
| S         | 9  | 0                                             | 8   | 0  | 21  | 55 | 1  | 7  | 8   | 2   |  |
| T         | 8  | 3                                             | 161 | 44 | 12  | 6  | 2  | 31 | 7   | 0   |  |
| V         | 79 | 9                                             | 8   | 2  | 2   | 2  | 3  | 11 | 83  | 18  |  |
| W         | 8  | 2                                             | 2   | 8  | 113 | 22 | 3  | 0  | 13  | 8   |  |
| Y         | 16 | 36                                            | 14  | 39 | 62  | 8  | 0  | 0  | 8   | 20  |  |

| VRC 19-36 |     | Score A6L <sub>75-84</sub> SFWFLKSGAV = 948 |     |     |     |     |    |     |     |     |  |
|-----------|-----|---------------------------------------------|-----|-----|-----|-----|----|-----|-----|-----|--|
|           | P1  | P2                                          | P3  | P4  | P5  | P6  | P7 | P8  | P9  | P10 |  |
| A         | 0   | 14                                          | 0   | 9   | 0   | 3   | 30 | 54  | 312 | 0   |  |
| C         | 49  | 10                                          | 0   | 0   | 12  | 3   | 0  | 0   | 10  | 0   |  |
| D         | 29  | 0                                           | 10  | 0   | 20  | 26  | 0  | 0   | 7   | 1   |  |
| E         | 66  | 3                                           | 0   | 0   | 0   | 11  | 0  | 0   | 13  | 0   |  |
| F         | 11  | 15                                          | 0   | 92  | 29  | 0   | 0  | 6   | 0   | 8   |  |
| G         | 0   | 4                                           | 0   | 0   | 4   | 37  | 24 | 166 | 0   | 27  |  |
| H         | 0   | 2                                           | 0   | 0   | 15  | 10  | 0  | 1   | 96  | 58  |  |
| I         | 25  | 0                                           | 0   | 15  | 155 | 0   | 16 | 14  | 17  | 90  |  |
| K         | 33  | 19                                          | 3   | 71  | 75  | 197 | 19 | 0   | 1   | 8   |  |
| L         | 55  | 9                                           | 10  | 18  | 11  | 48  | 21 | 1   | 29  | 89  |  |
| M         | 66  | 0                                           | 0   | 0   | 5   | 2   | 2  | 0   | 5   | 2   |  |
| N         | 8   | 9                                           | 0   | 13  | 26  | 5   | 20 | 6   | 1   | 99  |  |
| P         | 2   | 49                                          | 0   | 77  | 168 | 83  | 24 | 2   | 122 | 2   |  |
| Q         | 0   | 18                                          | 0   | 58  | 0   | 49  | 0  | 2   | 13  | 15  |  |
| R         | 107 | 94                                          | 71  | 117 | 146 | 138 | 14 | 96  | 29  | 101 |  |
| S         | 1   | 11                                          | 8   | 1   | 28  | 0   | 19 | 46  | 23  | 0   |  |
| T         | 1   | 0                                           | 0   | 0   | 0   | 0   | 44 | 31  | 12  | 0   |  |
| V         | 1   | 2                                           | 0   | 0   | 7   | 6   | 2  | 0   | 4   | 0   |  |
| W         | 43  | 113                                         | 135 | 23  | 137 | 85  | 13 | 8   | 2   | 27  |  |
| Y         | 0   | 9                                           | 0   | 7   | 8   | 109 | 0  | 7   | 0   | 183 |  |

| VRC 47-38 |     | Score F13L <sub>361-370</sub> DWVSSHKSIL = 2593 |     |     |     |     |     |     |     |     |  |
|-----------|-----|-------------------------------------------------|-----|-----|-----|-----|-----|-----|-----|-----|--|
|           | P1  | P2                                              | P3  | P4  | P5  | P6  | P7  | P8  | P9  | P10 |  |
| A         | 33  | 103                                             | 44  | 21  | 125 | 14  | 134 | 24  | 21  | 21  |  |
| C         | 33  | 0                                               | 34  | 88  | 57  | 20  | 38  | 10  | 72  | 49  |  |
| D         | 88  | 196                                             | 14  | 20  | 31  | 22  | 1   | 8   | 8   | 60  |  |
| E         | 18  | 12                                              | 14  | 5   | 28  | 13  | 3   | 9   | 10  | 19  |  |
| F         | 84  | 103                                             | 59  | 274 | 35  | 75  | 48  | 65  | 166 | 91  |  |
| G         | 30  | 157                                             | 25  | 36  | 64  | 31  | 30  | 13  | 19  | 26  |  |
| H         | 124 | 242                                             | 14  | 17  | 236 | 370 | 58  | 24  | 81  | 120 |  |
| I         | 93  | 76                                              | 27  | 141 | 243 | 186 | 141 | 48  | 69  | 142 |  |
| K         | 15  | 59                                              | 42  | 357 | 24  | 67  | 46  | 383 | 40  | 15  |  |
| L         | 38  | 124                                             | 74  | 82  | 37  | 114 | 34  | 118 | 88  | 53  |  |
| M         | 144 | 70                                              | 46  | 31  | 318 | 45  | 107 | 58  | 37  | 92  |  |
| N         | 70  | 232                                             | 39  | 307 | 10  | 217 | 295 | 4   | 3   | 134 |  |
| P         | 365 | 324                                             | 139 | 26  | 155 | 306 | 134 | 156 | 71  | 9   |  |
| Q         | 66  | 94                                              | 78  | 61  | 44  | 35  | 16  | 11  | 21  | 35  |  |
| R         | 84  | 65                                              | 118 | 376 | 171 | 134 | 107 | 113 | 104 | 75  |  |
| S         | 79  | 26                                              | 17  | 331 | 329 | 63  | 352 | 57  | 23  | 31  |  |
| T         | 111 | 37                                              | 147 | 22  | 77  | 159 | 61  | 15  | 17  | 48  |  |
| V         | 72  | 72                                              | 371 | 121 | 228 | 26  | 15  | 13  | 41  | 64  |  |
| W         | 276 | 293                                             | 237 | 345 | 123 | 312 | 53  | 0   | 178 | 64  |  |
| Y         | 209 | 57                                              | 15  | 121 | 48  | 128 | 15  | 29  | 87  | 347 |  |

  Amino acid corresponding to identified peptide
