# Supplementary material for: GM-CSF Production Allows the Identification of Immunoprevalent Antigens Recognized by Human CD4+ T Cells Following Smallpox Vaccination
Source: PubMed Central journal article supplement (PMC3170313; doi:10.1371/journal.pone.0024091), 2011-09-09
Supplement: pone.0024091.s003.pdf [file pone.0024091.s003.pdf]

Table 2S. Peptides identified from positional scanning based biometrical analysis for each T cell clone

| Clone                 | Peptide #           | Sequence            | Vaccinia gene | Score | Relat. Max |       | Activity |               |
|-----------------------|---------------------|---------------------|---------------|-------|------------|-------|----------|---------------|
|                       |                     |                     |               |       | Score      | Score | GM-CSF   | TNF- $\alpha$ |
| VRC19-16 <sup>a</sup> | TPI 1713-1          | Y I D A Y V S R L L | VACWR118      | 1526  | 0.71       | ++    | ++       |               |
|                       | 2                   | F T V R L V S R N Y | VACWR089      | 1383  | 0.64       | -     | -        |               |
|                       | 3                   | D D D A V H S R V Y | VACWR170      | 1376  | 0.64       | -     | -        |               |
|                       | 4                   | L R D L V Y L R L Y | VACWR080      | 1309  | 0.61       | -     | -        |               |
|                       | 5                   | A V R A F L L R H Y | VACWR188      | 1295  | 0.60       | -     | -        |               |
|                       | 6                   | H V I D V D V R L Y | VACWR201      | 1295  | 0.60       | -     | -        |               |
|                       | 7                   | F F Q Q K D K R F Y | VACWR049      | 1279  | 0.60       | -     | -        |               |
|                       | 8                   | V V D I I V N R L Y | VACWR098      | 1258  | 0.59       | -     | -        |               |
|                       | 9                   | Y N I A D A A R H Y | VACWR129      | 1253  | 0.58       | -     | -        |               |
|                       | 10                  | D V L I V V S R H L | VACWR138      | 1222  | 0.57       | -     | -        |               |
|                       | 11                  | I D V Q T G R R P Y | VACWR150      | 1218  | 0.57       | -     | -        |               |
|                       | 12                  | F R F E N V K R D Y | VACWR024      | 1211  | 0.56       | -     | -        |               |
|                       | 13                  | M R R I A V V R F R | VACWR110      | 1211  | 0.56       | -     | -        |               |
|                       | 14                  | F W V S D D E R C Y | VACWR052      | 1204  | 0.56       | -     | -        |               |
|                       | 15                  | E V D A L R S R I R | VACWR148      | 1197  | 0.56       | -     | -        |               |
|                       | 16                  | Y S H Q L V S S I Y | VACWR180      | 1196  | 0.56       | -     | -        |               |
|                       | 17                  | C I V Q S V L R D I | VACWR085      | 1195  | 0.56       | -     | -        |               |
|                       | 18                  | E I L R N Y L R L Y | VACWR051      | 1190  | 0.55       | -     | -        |               |
|                       | 19                  | L L S Q Y L S R V S | VACWR144      | 1190  | 0.55       | -     | -        |               |
|                       | 20                  | W C Y S Q V N K R Y | VACWR184      | 1190  | 0.55       | -     | -        |               |
| VRC19-29              | TPI 1751-18         | M Y T Y F S N T I L | VACWR057      | 699   | 0.84       | ++    | ++       |               |
|                       | 19                  | M Y T I D S S T I Q | VACWR189      | 613   | 0.73       | -     | -        |               |
|                       | 20                  | I Y T Y D R V D I Y | VACWR129      | 593   | 0.71       | -     | -        |               |
|                       | 21                  | E Y T A C N N T I I | VACWR162      | 592   | 0.71       | -     | -        |               |
|                       | 22                  | M E T D R E N A I I | VACWR079      | 589   | 0.70       | -     | -        |               |
|                       | 23                  | L Y T T I E Q N I D | VACWR102      | 583   | 0.70       | -     | -        |               |
|                       | 24                  | V L T T D G F Y I D | VACWR126      | 578   | 0.69       | -     | -        |               |
|                       | 25                  | I D T T V T I N I I | VACWR201      | 578   | 0.69       | -     | -        |               |
|                       | 26                  | V E T V Y W S R I C | VACWR126      | 569   | 0.68       | -     | -        |               |
|                       | 27                  | I L T F V K N K I I | VACWR045      | 565   | 0.68       | -     | -        |               |
|                       | 28                  | V N T V Y C K N I L | VACWR042      | 561   | 0.67       | -     | -        |               |
|                       | 29                  | N Q T T P Y N F I A | VACWR165      | 559   | 0.67       | -     | -        |               |
|                       | 30                  | M F T L L S H T I C | VACWR040      | 557   | 0.67       | -     | -        |               |
|                       | 31                  | L V T S F T N D I L | VACWR160      | 556   | 0.66       | -     | -        |               |
|                       | 32                  | L M T D D N I N I L | VACWR039      | 554   | 0.66       | -     | -        |               |
|                       | 33                  | L E T Y T R P E I D | VACWR051      | 553   | 0.66       | -     | -        |               |
|                       | 34                  | V L T G Y G L E I N | VACWR031      | 551   | 0.66       | -     | -        |               |
| 35                    | Y Y T T Y I D H I V | VACWR058            | 547           | 0.65  | -          | -     |          |               |
| VRC19-36              | TPI 1751-36         | M R M R F K K G A V | VACWR184      | 1000  | 0.65       | -     | -        |               |
|                       | 37                  | S F W F L K S G A V | VACWR125      | 948   | 0.61       | ++    | ++       |               |
|                       | 38                  | R E R G I K Y L A I | VACWR194      | 936   | 0.61       | -     | -        |               |
|                       | 39                  | R E I K I Y E G A K | VACWR036      | 931   | 0.60       | -     | -        |               |
|                       | 40                  | N K F S F K R G A Y | VACWR069      | 929   | 0.60       | -     | -        |               |
|                       | 41                  | I E I I P K I K A Y | VACWR102      | 919   | 0.60       | -     | -        |               |
|                       | 42                  | L I T P R Y S G A S | VACWR026      | 884   | 0.57       | -     | -        |               |
|                       | 43                  | L E R Q P R R S P Y | VACWR142      | 858   | 0.56       | -     | -        |               |
|                       | 44                  | E R W F H G D A A W | VACWR042      | 832   | 0.54       | -     | -        |               |
|                       | 45                  | K R W R R F D G P C | VACWR163      | 813   | 0.53       | -     | -        |               |
|                       | 46                  | M W D L K K K G L I | VACWR078      | 783   | 0.51       | -     | -        |               |
| 47                    | R R W L K I K R D Y | VACWR176            | 734           | 0.48  | -          | -     |          |               |
| 48                    | G Y R K Q K M G P I | VACWR025            | 728           | 0.47  | -          | -     |          |               |
| 49                    | R R F R R P M S L R | VACWR068            | 725           | 0.47  | -          | -     |          |               |
| 50                    | R M R F K K G A V L | VACWR184            | 713           | 0.46  | -          | -     |          |               |
| VRC47-38              | TPI 1751-51         | D W V S S H S K S L | VACWR052      | 2593  | 0.76       | ++    | ++       |               |
|                       | 54                  | T I V K S L N K I Y | VACWR048      | 2451  | 0.72       | -     | -        |               |
|                       | 59                  | P M P R H H S I V Y | VACWR026      | 2343  | 0.69       | -     | -        |               |
|                       | 60                  | A L W S A H N K L Y | VACWR180      | 2332  | 0.69       | -     | -        |               |
|                       | 61                  | P W I K T I S K R M | VACWR143      | 2237  | 0.66       | -     | -        |               |
|                       | 71                  | S E V F I H N K I N | VACWR077      | 2229  | 0.66       | -     | -        |               |
|                       | 65                  | N N V Q S L I K F I | VACWR125      | 2009  | 0.59       | -     | -        |               |
|                       | 66                  | M P V K G K R K D I | VACWR155      | 1966  | 0.58       | -     | -        |               |
|                       | 68                  | H N V S S L V K N V | VACWR057      | 1965  | 0.58       | -     | -        |               |
|                       | 63                  | V I V R N L N K I I | VACWR073      | 1907  | 0.56       | -     | -        |               |
|                       | 69                  | S H V K S V T K S S | VACWR117      | 1902  | 0.56       | -     | -        |               |
|                       | 64                  | Y I V H S Y L K N Y | VACWR203      | 1897  | 0.56       | -     | -        |               |
|                       | 62                  | L L V S S S V K H I | VACWR110      | 1876  | 0.55       | -     | -        |               |
|                       | 67                  | D G V S S L L K E L | VACWR138      | 1869  | 0.55       | -     | -        |               |
|                       | 56                  | L Y V K A L T K N Y | VACWR062      | 1854  | 0.55       | -     | -        |               |
|                       | 70                  | N F V S S F L K A N | VACWR120      | 1851  | 0.55       | -     | -        |               |
|                       | 52                  | V I V S T F N K T I | VACWR102      | 1838  | 0.54       | -     | -        |               |
| 55                    | Y I V V N P M K M I | VACWR122            | 1761          | 0.52  | -          | -     |          |               |
| 53                    | N I V K D L K K I I | VACWR103            | 1658          | 0.48  | -          | -     |          |               |
| 58                    | D R V L N I N K N G | VACWR186            | 1510          | 0.44  | -          | -     |          |               |
| 57                    | L L V N N H L G I G | VACWR010            | 1363          | 0.40  | -          | -     |          |               |

<sup>a</sup> 20 of 35 synthesized peptides are shown

++ Active at 10 and 1 $\mu$ g/ml

- No response

BA score: biometrical analysis score

VRC19-36, scores from Screen 1
